# Supplementary material for: Dual Inhibition of P-gp and BCRP Improves Oral Topotecan Bioavailability in Rodents
Source: MDPI journal article supplement (doi:10.3390/pharmaceutics13040559), 2021-04-15
Supplement: s1 [file s1]

# Supplementary Materials: Dual Inhibition of P-gp and BCRP Improves Oral Topotecan Bioavailability in Rodents

Jaeok Lee, Jiyeon Kang, Na Yun Kwon, Aneesh Sivaraman, Ravi Naik, So Young Jin, A Reum Oh, Jae-Ho Shin, Younghwa Na, Kyeong Lee and Hwa Jeong Lee

## 1. Materials

Verapamil (VER) and elacridar (ELA) were purchased from Mesochem (Beijing Mesochem Technology Co., Ltd., China). The CYP3A4 activity assay kit was purchased from BioVision (BioVision Incorporated, USA).

## 2. Cell Survival Study

MCF-7/ADR and MCF-7/MX100 cells ( $9 \times 10^3$  in 96-well plates) and HT29 cells ( $6 \times 10^3$  in 96-well plates) were incubated with TPT with or without VER (a P-gp inhibitor), zosuquidar, Ko143, and ELA (a P-gp and BCRP inhibitor) for 48 h. MX and DNR were treated with or without the inhibitor candidates for 2 h and then incubated in normal fresh medium for another 70 h. At the final time point, the incubation was stopped, and sulforhodamine B staining was performed. The absorbance was measured at 515 nm (Multiskan GO with Cuvette function #1510-04234, Thermo Fisher Scientific, Finland). The assay was performed in triplicate.

## 3. Substrate Drug Accumulation Study by Flow Cytometry

The cells ( $1 \times 10^6$ – $3 \times 10^6$ ) were incubated in pre-warmed phenol red-free media (500  $\mu$ L) with 10  $\mu$ M DNR in the presence and/or absence of 1  $\mu$ M zosuquidar for 30 min or 200  $\mu$ M TPT for 30–120 min at 37 °C. TPT accumulation in cells resuspended in cold PBS was analyzed by flow cytometry (NovoCyte 2060R, ACEA Biosciences Inc., USA). The assay was performed using at least three different biological duplicates.

## 4. Pharmacokinetic Studies

### 4.1. Drug Formulations

In the modified Taxol® formulation, TPT was prepared at a concentration of 2 mg/mL immediately prior to use. TPT was also dissolved in isotonic saline at a concentration of 2.5 mg/mL. Zosuquidar and Ko143 were dissolved in DMSO at 2.5 mg/mL and 1.0 mg/mL, respectively, and each compound in DMSO was mixed with TPT (2 mg/mL) in the DMSO-free modified Taxol® formulation for oral administration. Tween® 80 was dissolved in TPT/saline to obtain final concentrations of 1% and 2.5%.

### 4.2. Oral Administration and Plasma Sampling

For PK studies, healthy SD rats (male, 7–8-weeks old, 224–289 g) ( $n = 4$ – $6$ ) were used for the oral administration of TPT (20 mg/kg) with or without zosuquidar (25 mg/kg), Ko143 (10 mg/kg), and the combination of zosuquidar and Ko143 in the modified Taxol® formulation. After drug administration, blood sampling was performed at 0, 0.05, 0.12, 0.25, 0.5, 1, 2, 3, 4, 6, 10, and 24 h.

The SD rats (male, 7–8-weeks old, 235–265 g) were divided into four groups ( $n = 6$ – $8$ ): TPT intravenous (IV) control (4 mg/kg), TPT PO control (40 mg/kg), TPT PO with 1% Tween® 80, and TPT PO with 2.5% Tween® 80. Blood sampling was done at 0, 0.033, 0.083, 0.25, 0.5, 1, 2, 3, 5, 7, 9, and 24 h after a single IV injection and at 0, 0.033, 0.083, 0.25, 0.5, 1, 2, 3, 5, 7, 9, 12, and 24 h after a single PO administration.

**Citation:** Lee, J.; Kang, J.; Kwon, N.Y.; Sivaraman, A.; Naik, R.; Jin, S.Y.; Oh, A.R.; Shin, J.-H.; Na, Y.; Lee, K.; et al. Dual Inhibition of P-gp and BCRP Improves Oral Topotecan Bioavailability in Rodents. *Pharmaceutics* **2021**, *13*, x. <https://doi.org/10.3390/pharmaceutics13040559>

Academic Editor: Yonghyun Lee

Received: 12 March 2021

Accepted: 13 April 2021

Published: 15 April 2021

**Publisher's Note:** MDPI stays neutral with regard to jurisdictional claims in published maps and institutional affiliations.

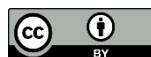

**Copyright:** © 2021 by the authors. Submitted for possible open access publication under the terms and conditions of the Creative Commons Attribution (CC BY) license (<http://creativecommons.org/licenses/by/4.0/>).

#### 4.3. PK Analysis

Phoenix WinNonlin® software (version 8.0–8.1, Pharsight Corporation, Mountain View, CA, USA) was used to estimate the PK parameters following oral TPT administration in rats. Non-compartmental analysis was performed using the plasma TPT concentration–time profiles to obtain the following PK parameters: initial plasma concentration ( $C_0$ ), area under the plasma concentration–time curve from zero to infinity ( $AUC_{INF}$ ), elimination half-life ( $t_{1/2}$ ), apparent volume of distribution ( $V_d$ ) after oral administration ( $V_d/F$ ), total clearance ( $Cl_t$ ), and total oral clearance ( $Cl_t/F$ ). The maximum plasma concentration ( $C_{max}$ ) and the time required to reach  $C_{max}$  ( $T_{max}$ ) were directly determined from the plasma TPT concentration–time curve. The absolute BA (AB) and the relative BA (RB) of TPT were calculated using the Equations 1 and 2:

$$AB (\%) = (AUC_{INF} \text{ PO administration}) / (AUC_{INF} \text{ IV control}) \times 100 \quad (1)$$

$$RB (\%) = (AUC_{INF} \text{ PO co-administration}) / (AUC_{INF} \text{ PO control}) \times 100 \quad (2)$$

#### 5. CYP3A4 Activity Assay

The effects of P-gp/BCRP dual inhibitor candidates on CYP3A4 enzyme activity were studied by using a fluorometric CYP3A4 activity assay kit according to the manufacturer's instructions. Human CYP3A4 converted the non-fluorescent CYP3A4 substrate to a fluorescent metabolite ( $Em/Ex = 535/587 \text{ nm}$ ) in the buffer containing an NADPH-generating system and  $\beta$ -NADP<sup>+</sup>. The vehicle (0.3% DMSO) was used as the control for the dual inhibitor candidates and the negative control comprised the reaction mixture without CYP3A4. Ketoconazole (30  $\mu\text{M}$ ) was used as the enzyme inhibitor control, and resorufin was used to construct the standard curve. Each dual inhibitor candidate was added at a final concentration of 30  $\mu\text{M}$ . The reaction was monitored in kinetic mode for 35 min using a microplate multireader (Infinite F200 PRO, Tecan, Switzerland).

#### 6. Statistical Analysis

Tukey's HSD or Dunnett's T3 test in conjunction with one-way ANOVA (Free GraphPad Prism, version 8.3.0, La Jolla, USA) was used for the statistical analysis of DNR accumulation, cell survival, and PK analysis. TPT accumulation was analyzed with Student's *t*-test/*F*-test. PK parameters are presented as mean  $\pm$  S.D., and other data are presented as mean  $\pm$  S.E.M. Statistical significance was considered to be *p* values  $< 0.05$ .

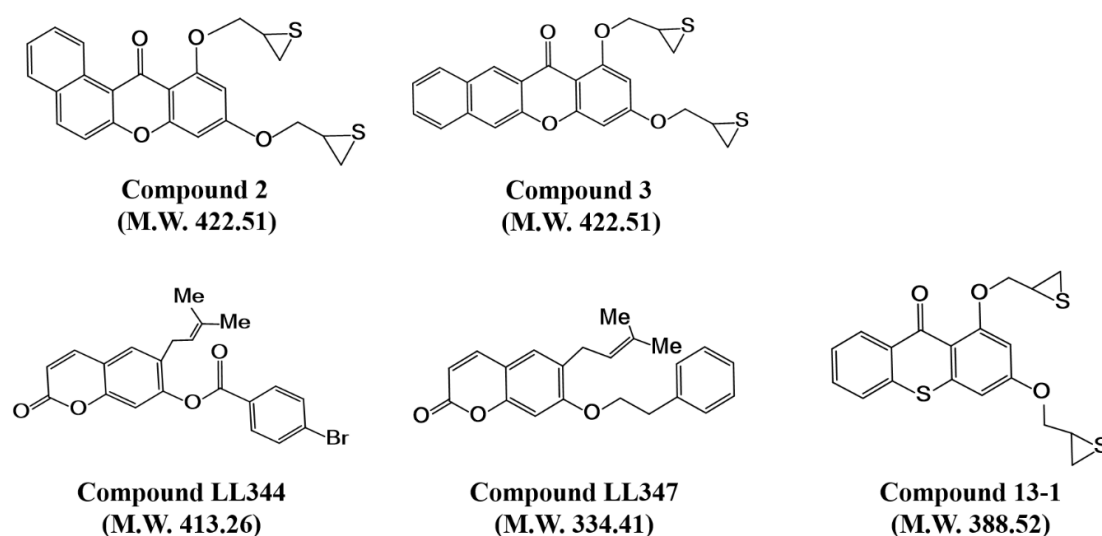

**Figure S1.** The structure of P-gp inhibitors. Benzoxanthone analogues, #2 and #3; coumarin derivatives, LL344 and LL347; xanthone derivative #13-1. M.W., molecular weight.

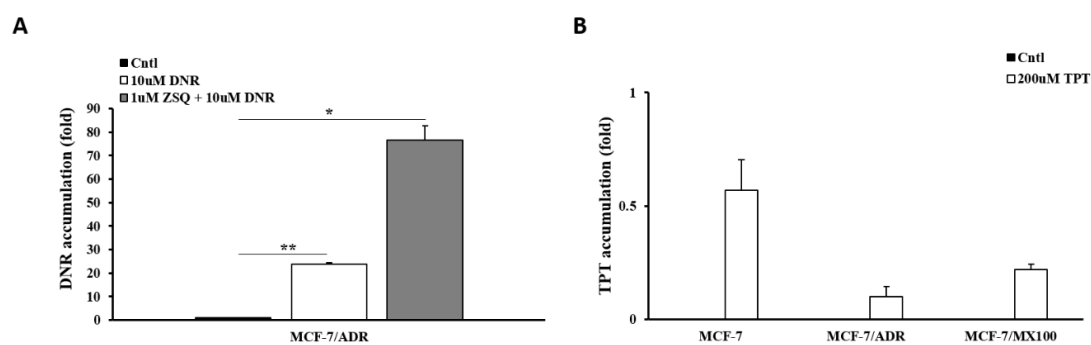

**Figure S2.** P-gp or/and BCRP substrate anticancer drug accumulation analysis. **(A)** DNR accumulation in P-gp over-expressed cells. **(B)** TPT accumulation. \*,  $p < 0.05$ ; \*\*,  $p < 0.01$ .

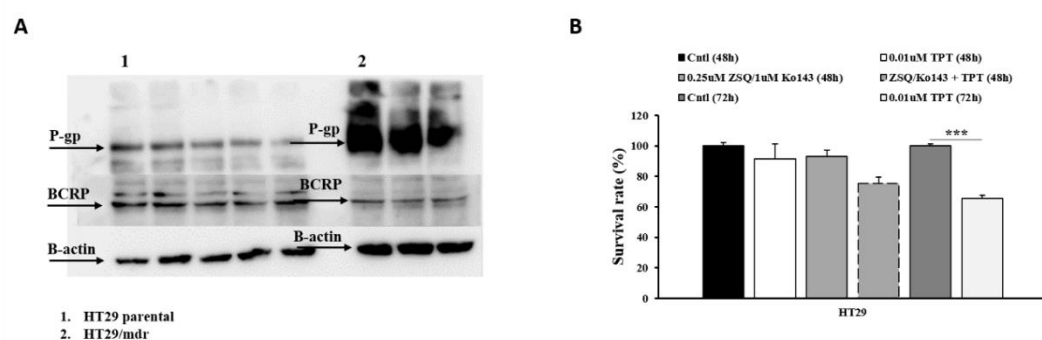

**Figure S3.** In vitro study in human colon cancer cell, HT29. **(A)** Endogenous P-gp and BCRP proteins expression in HT29 cells. Lane 1, HT29 cells and lane 2, HT29/mdr cells overexpressed P-gp by colchicine treatment. **(B)** Survival rate of TPT with specific P-gp and BCRP dual inhibitors. Cntl, control; ZSQ, zosuquidar. \*\*\*,  $p < 0.001$ .

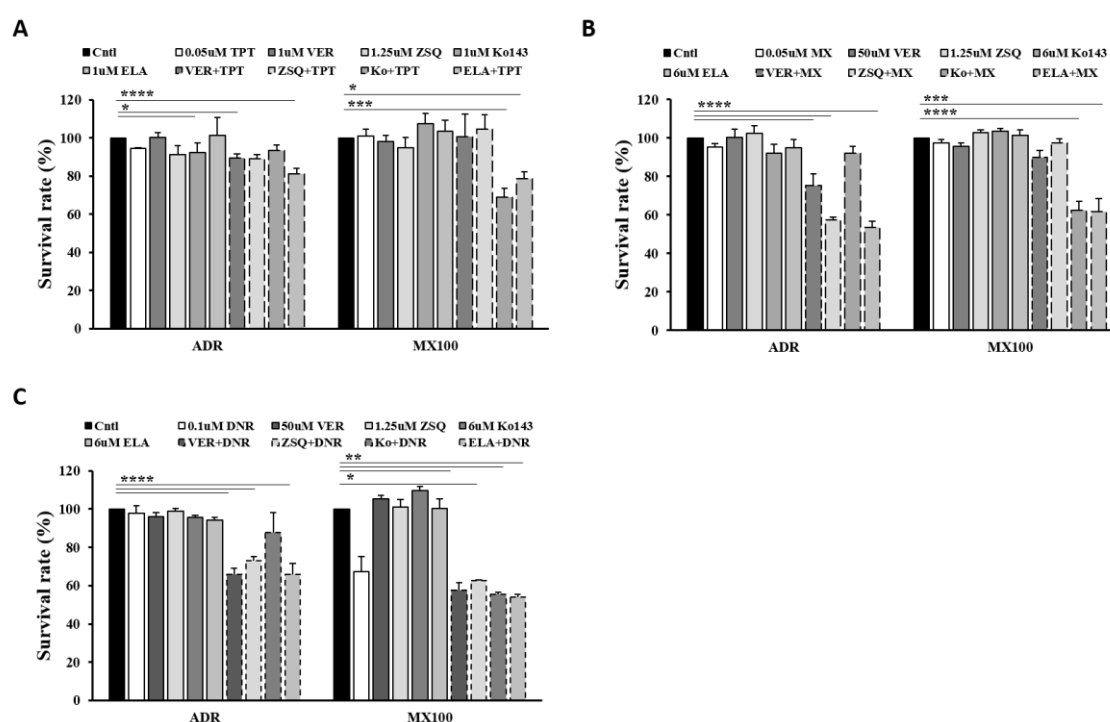

**Figure S4.** The effects of different anticancer drugs, P-gp- or/and BCRP-dependent, on cancer cell death. (A) TPT treatment with P-gp or/and BCRP inhibitors for 48 h. (B) and (C)-MX and DNR treatment with P-gp or/and BCRP inhibitors for 2 h (total incubation for 72 h). Cntl, control; VER, verapamil (P-gp inhibitor); ZSQ, zosuquidar (specific P-gp inhibitor); Ko, Ko143 (specific BCRP inhibitor); ELA, elacridar (P-gp/BCRP inhibitor). \*,  $p < 0.05$ ; \*\*,  $p < 0.01$ ; \*\*\*,  $p < 0.001$ ; \*\*\*\*,  $p < 0.0001$ .

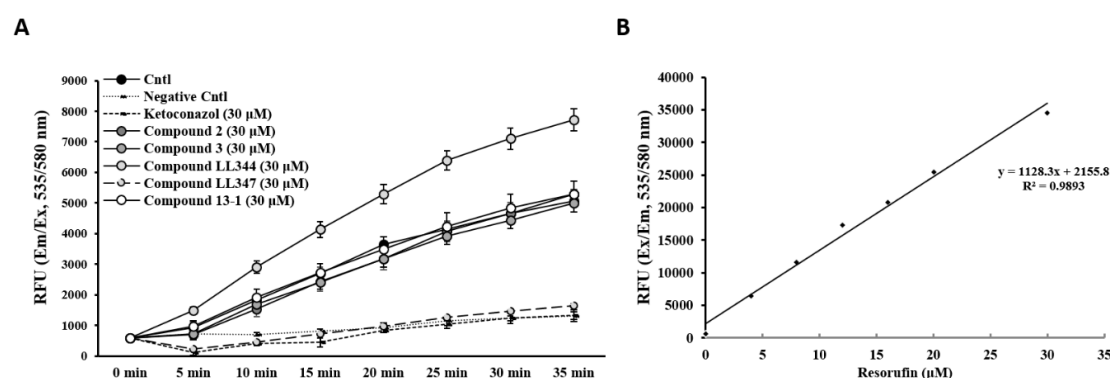

**Figure S5.** CYP3A4 activation assay with P-gp and BCRP dual inhibitors in vitro. **(A)** CYP3A4 assay with dual inhibitors and **(B)** Resorufin standard curve. Bars represent S.E.M. ( $n = 3-4$ ). Cntl, solvent control; Ketoconazol, inhibitor control.

**Table S1.** Working concentration of dual inhibitors in vitro.

| Incubation time |                    | #2    | #3    | LL344 | LL347 | #13-1 |
|-----------------|--------------------|-------|-------|-------|-------|-------|
| 30 min          | Concentration (μM) | 50.00 | 12.50 | 50.00 | 12.50 | 12.50 |
|                 | Survival rate (%)  | 94.38 | 92.40 | 96.82 | 96.25 | 79.45 |
| 48 h            | Concentration (μM) | 6.25  | 6.25  | 50.00 | 6.25  | 3.125 |
|                 | Survival rate (%)  | 96.80 | 96.00 | 97.65 | 85.18 | 92.39 |

#2: compound 2; #3: compound 3; **LL344**: compound LL344; **LL347**: compound LL347; **#13-1**: compound 13-1.

**Table S2.** Effects of P-gp and/or BCRP inhibitor on PK parameters of TPT following oral administration to rats.

| PK Parameters                | Oral Administration                |                     |                        |                     |
|------------------------------|------------------------------------|---------------------|------------------------|---------------------|
|                              | TPT/Modified Taxol®<br>Formulation | ZSQ (25 mg/kg) +TPT | Ko143 (10 mg/kg) + TPT | ZSQ/Ko + TPT        |
| $C_{\max}$ (µg/mL)           | 0.727 ± 0.265                      | 0.987 ± 0.422       | 1.60 ± 0.318**         | 2.40 ± 0.813        |
| $T_{\max}$ (h)               | (0.5–1.0)                          | (1.0)               | (0.5–2.0)              | (0.5–1.0)           |
| $AUC_{\text{INF}}$ (µg·h/mL) | 2.36 ± 0.543                       | 4.20 ± 1.14         | 5.67 ± 2.33            | 7.71 ± 1.67 *       |
| $t_{1/2}$ (h)                | 3.39 ± 1.09                        | 5.00 ± 0.908        | 2.72 ± 1.14            | 2.98 ± 1.48         |
| $V_d/F$ (L)                  | 42.1 ± 14.1                        | 38.3 ± 19.7         | 15.6 ± 8.58*           | 11.5 ± 5.88 *       |
| $Cl_t/F$ (L/h)               | 8.94 ± 2.58                        | 5.13 ± 1.83         | 4.06 ± 1.78*           | 2.70 ± 0.678 **     |
| <b>RB (%)</b>                | <b>100.0</b>                       | <b>177.6 ± 48.4</b> | <b>240.0 ± 98.6</b>    | <b>326.1 ± 70.6</b> |

ZSQ: zosuquidar; ZSQ/Ko: the mixture of zosuquidar and Ko143.  $n = 4-6$  per group. \*  $p < 0.05$ ; \*\*  $p < 0.01$ .

**Table S3.** Effects of Tween 80 on PK parameters of TPT following oral administration to rats.

| PK Parameters                | IV (4 mg/kg)  | PO (40 mg/kg)      |                     |                     |
|------------------------------|---------------|--------------------|---------------------|---------------------|
|                              | TPT/Saline    | TPT/Saline         | +1.0% Tween 80      | +2.5% Tween 80      |
| $C_0$ (µg/mL)                | 2.64 ± 0.764  | -                  | -                   | -                   |
| $C_{\max}$ (µg/mL)           | -             | 0.235 ± 0.158      | 0.639 ± 0.384       | 0.711 ± 0.294**     |
| $T_{\max}$ (h)               | -             | (0.033–0.5)        | (0.033–1.0)         | (0.033–0.5)         |
| $AUC_{\text{INF}}$ (µg·h/mL) | 1.37 ± 0.280  | 2.30 ± 0.706       | 3.99 ± 1.78         | 3.42 ± 0.687*       |
| $t_{1/2}$ (h)                | 0.914 ± 0.115 | 16.5 ± 5.26        | 12.4 ± 5.35         | 12.0 ± 5.02         |
| $V_d$ (L)                    | 1.01 ± 0.233  | -                  | -                   | -                   |
| $V_d/F$ (L)                  | -             | 109.2 ± 33.20      | 48.4 ± 14.0*        | 50.3 ± 17.1*        |
| $Cl_t$ (L/h)                 | 0.768 ± 0.171 | -                  | -                   | -                   |
| $Cl_t/F$ (L/h)               | -             | 4.84 ± 1.59        | 3.01 ± 1.22         | 3.07 ± 0.690        |
| <b>AB (%)</b>                | <b>-</b>      | <b>16.8 ± 5.16</b> | <b>29.2 ± 13.0</b>  | <b>25.0 ± 5.02</b>  |
| <b>RB (%)</b>                | <b>-</b>      | <b>100.0</b>       | <b>173.9 ± 77.3</b> | <b>149.0 ± 29.9</b> |

$n = 6-8$  per group. \*  $p < 0.05$ ; \*\*  $p < 0.01$ .
